# Supplementary material for: Transcriptome analysis of human heart failure reveals dysregulated cell adhesion in dilated cardiomyopathy and activated immune pathways in ischemic heart failure
Source: BMC Genomics. 2018 Nov 12;19:812. doi: 10.1186/s12864-018-5213-9 (PMC6233272; doi:10.1186/s12864-018-5213-9)
Supplement: Supplementary file 2 — Table S2. RNAseq quality control table. Raw read counts ranged from ~ 36 to 66 million. Read counts show a 99% retention after base quality control and a 94–96% alignment rate. (XLSX 16 kb) [file 12864_2018_5213_MOESM2_ESM.xlsx]

## Sheet: RNA-seq QC
Additional File 2: Table S2 RNAseq quality control table. Raw read counts ranged from ~36-66 million. Read counts show a 99% retention after base quality quality control and a 94-96% alignment rate.
Sample	Raw reads	Reads after QC	Percent yield after QC	Reads aligned	Percent yield after alignment
NF8	57720015	57285773	0.992477	55346152	0.958873
NF7	44028320	43712883	0.992836	42105154	0.95632
NF6	55524901	55125616	0.992809	52940483	0.953455
NF5	50842363	50468172	0.99264	48549009	0.954893
NF4	53646936	53269546	0.992965	51325392	0.956726
NF3	45100274	44779014	0.992877	43035675	0.954222
NF2	42564384	42263328	0.992927	40882177	0.960479
NF15	55840407	55431532	0.992678	53551987	0.959019
NF14	46963851	46619695	0.992672	44945987	0.957034
NF13	59874095	59415820	0.992346	57269228	0.956494
NF12	64882190	64403196	0.992617	62088842	0.956947
NF11	65692706	65214181	0.992716	62645616	0.953616
NF10	49689489	49328352	0.992732	47628289	0.958518
NF1	49439511	49097905	0.99309	47545579	0.961692
ICM64	51441459	51100543	0.993373	49000107	0.952541
ICM63	42951721	42668968	0.993417	40829541	0.950592
ICM61	41525949	40852027	0.983771	39069828	0.940853
ICM59	45696316	45403968	0.993602	43627273	0.954722
ICM58	41746672	41465960	0.993276	39740426	0.951942
ICM56	36062946	35823914	0.993372	33887389	0.939673
ICM55	43031907	42743543	0.993299	40966204	0.951996
ICM54	40338610	40070124	0.993344	38436755	0.952853
ICM53	52425366	52121308	0.9942	50071561	0.955102
ICM52	48743281	48439448	0.993767	46685229	0.957778
ICM50	43137716	42866911	0.993722	41185591	0.954747
ICM49	57271297	56949744	0.994385	54565934	0.952762
ICM47	53194185	52825958	0.993078	50607502	0.951373
DCM8	45791213	45480370	0.993212	43654529	0.953339
DCM78	43789366	43438536	0.991988	41973980	0.958543
DCM77	42763413	42458250	0.992864	40762829	0.953217
DCM76	51157785	50786729	0.992747	48893295	0.955735
DCM75	43482252	43170922	0.99284	41604894	0.956825
DCM74	48268291	47922689	0.99284	46121660	0.955527
DCM73	49423951	49077569	0.992992	47238521	0.955782
DCM72	48492947	48151996	0.992969	46318457	0.955159
DCM6	52038373	51716651	0.993818	49575238	0.952667
DCM46	45599797	45301724	0.993463	43562967	0.955332
DCM44	49226109	48887895	0.993129	46805277	0.950822
DCM43	46004873	45703613	0.993452	43826417	0.952647
DCM4	48958404	48677580	0.994264	46738867	0.954665
DCM39	54888402	54530170	0.993473	52279663	0.952472
DCM38	57631945	57201067	0.992524	54915437	0.952865
DCM35	49672640	49323920	0.99298	47324702	0.952732
DCM34	46905250	46598487	0.99346	44809543	0.95532
DCM33	47277674	46982740	0.993762	45012740	0.952093
DCM32	45616500	45324504	0.993599	43715536	0.958327
DCM31	52044823	51734053	0.994029	49599016	0.953006
DCM3	46190701	45914223	0.994014	44100222	0.954742
DCM29	44245913	43801387	0.989953	41660791	0.941574
DCM28	56406403	56079470	0.994204	53827588	0.954282
DCM26	54266242	53947566	0.994128	51922999	0.95682
DCM24	48507535	48213278	0.993934	46313412	0.954767
DCM22	49929195	49611282	0.993633	47650801	0.954367
DCM21	44302843	44022182	0.993665	42168065	0.951814
DCM20	43472457	43138943	0.992328	41338660	0.950916
DCM2	44041982	43753958	0.99346	41918897	0.951794
DCM19	40303118	40013291	0.992809	38322579	0.950859
DCM18	39095341	38818597	0.992921	37367289	0.955799
DCM17	49233042	48867438	0.992574	46967178	0.953977
DCM16	45927210	45586193	0.992575	43698108	0.951464
DCM14	58658866	58286590	0.993654	56011446	0.954868
DCM13	42049580	41752854	0.992943	40026135	0.95188
DCM12	40562720	40300289	0.99353	38728485	0.95478
DCM11	43066279	42791026	0.993609	40866215	0.948914
